# Supplementary material for: Roll-to-roll sputtered and patterned Cu2−xO/Cu/Cu2−xO multilayer grid electrode for flexible smart windows
Source: Royal Society of Chemistry journal article supplement (doi:10.1039/c8ra03252a), 2018-01-01
Supplement: c8ra03252a1.pdf [file c8ra03252a1.pdf]

## Supplementary Information

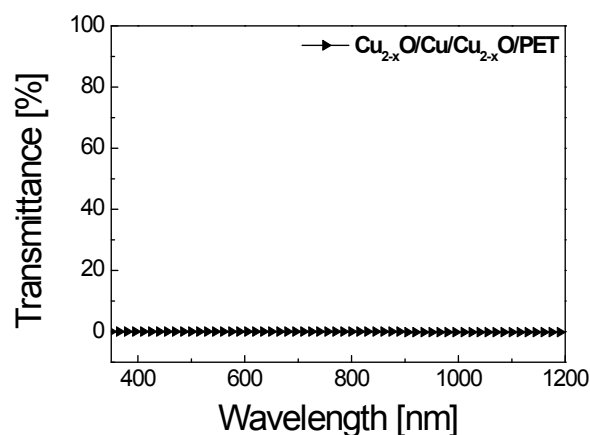

**Fig. S1.** Optical transmittance of as-deposited  $\text{Cu}_{2-x}\text{O}/\text{Cu}/\text{Cu}_{2-x}\text{O}$  multilayer before grid patterning.

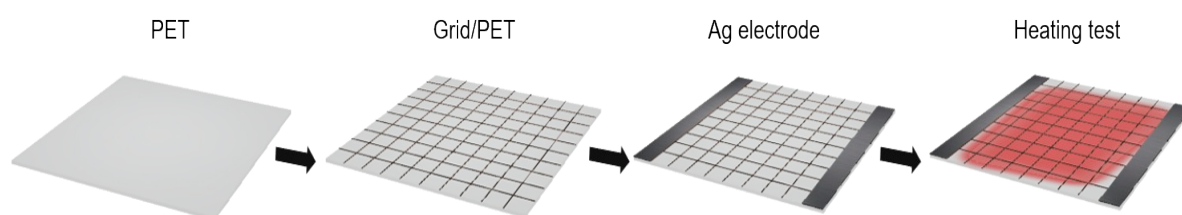

**Fig. S2.** Schematic of the TFH fabrication process using the RTR-sputtered  $\text{Cu}_{2-x}\text{O}/\text{Cu}/\text{Cu}_{2-x}\text{O}$  multilayer grid. Two terminal-side Ag contact electrodes were fabricated on the  $\text{Cu}_{2-x}\text{O}/\text{Cu}/\text{Cu}_{2-x}\text{O}$  multilayer grid films.

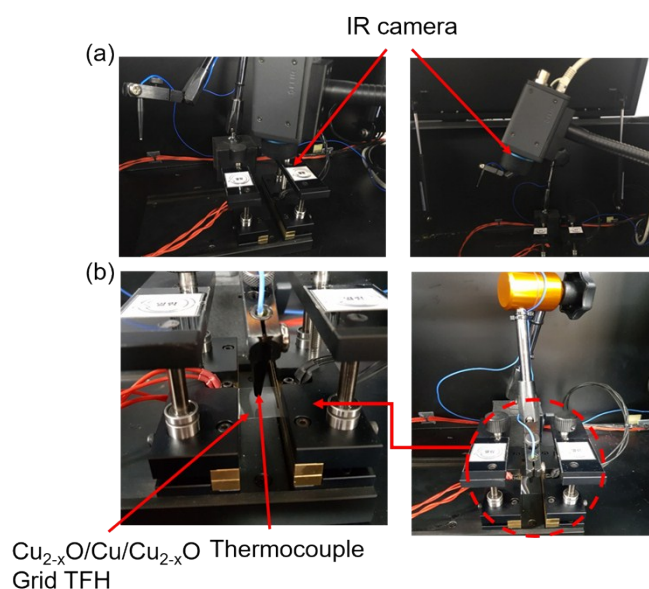

**Fig. S3.** Pictures of temperature measurement system for the TFHs, with (a) an IR image camera and

(b) a thermocouple.

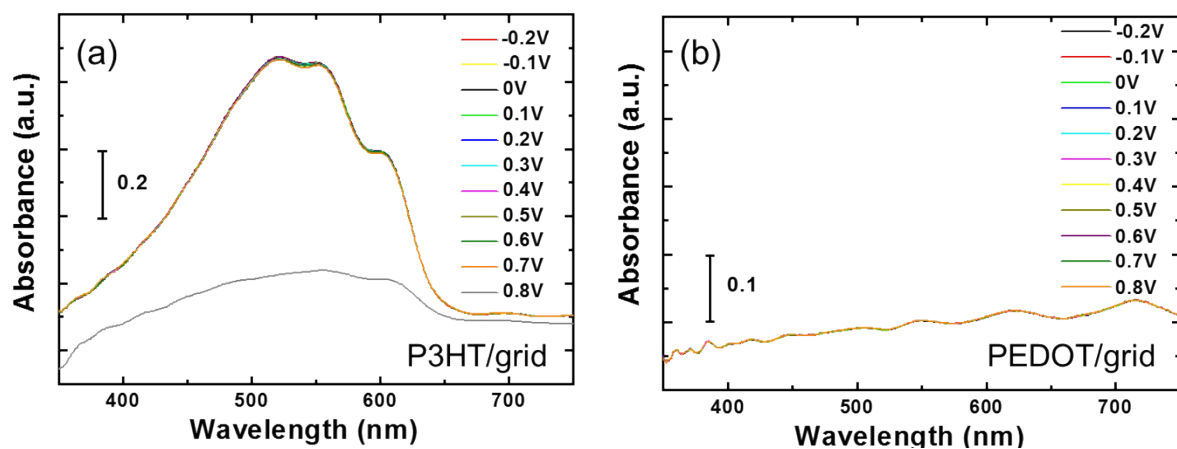

**Fig. S4.** Absorbance spectra obtained at potentials from -0.2 V to 0.8 V for (a) the P3HT and (b) PEDOT:PSS films spin-coated on  $\text{Cu}_{2-x}\text{O}/\text{Cu}/\text{Cu}_{2-x}\text{O}$  multilayer grid electrodes.

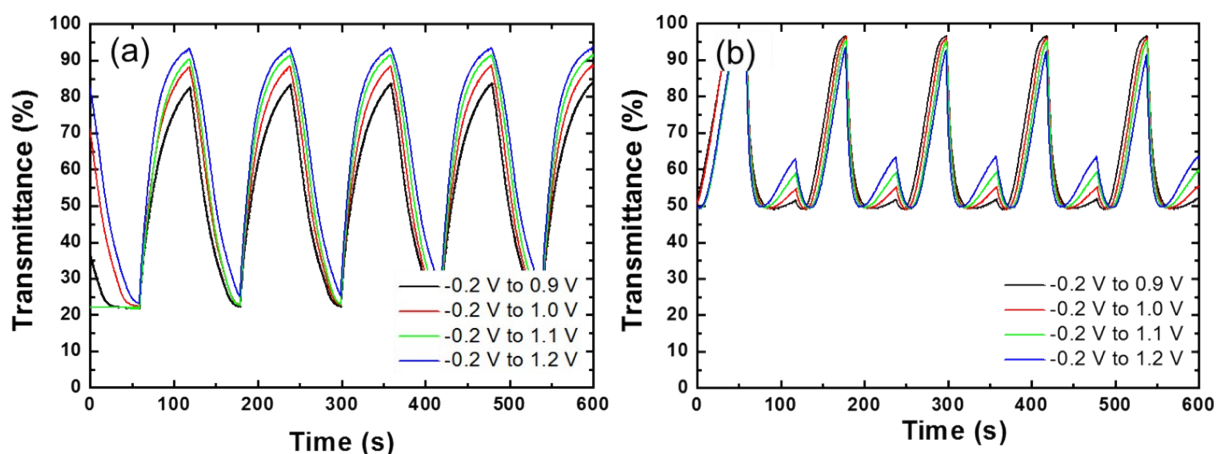

**Fig. S5.** *In situ* transmittance spectra for P3HT/PEDOT:PSS film measured (a) at 520 nm and (b) 720 nm when different voltage pulses were applied for an interval of 60 s.
